# Supplementary material
Source: PubMed Central journal article supplement (PMC5749240)
Supplement: NIHMS926838-supplement-Supplemental_Material.pdf [file NIHMS926838-supplement-Supplemental_Material.pdf]

## Supplementary materials

**Table 4.** Mean, SD and  $\pm 95\%$  CI of hippocampal volume ( $\text{mm}^3$ ) and brain regional thickness (mm) in SCD and controls

|                                                       |                                  | Controls                                       |           |            |            | SCD        |          |            |            |
|-------------------------------------------------------|----------------------------------|------------------------------------------------|-----------|------------|------------|------------|----------|------------|------------|
|                                                       |                                  | Hippocampal subfields volume ( $\text{mm}^3$ ) |           |            |            |            |          |            |            |
|                                                       |                                  | Mean                                           | SD        | -95%CI     | +95%CI     | Mean       | SD       | -95%CI     | +95%CI     |
| <b>RIGHT</b>                                          | <b>CA1*</b>                      | 328                                            | 41.3      | 313        | 343        | 318        | 44.5     | 301        | 334        |
|                                                       | <b>CA2_3</b>                     | 946                                            | 107.6     | 907        | 986        | 935        | 134.0    | 885        | 985        |
|                                                       | <b>CA4 DG</b>                    | 530                                            | 60.4      | 508        | 552        | 523        | 77.4     | 494        | 552        |
|                                                       | <b>Fimbria</b>                   | 54                                             | 20.0      | 46         | 61         | 54         | 19.5     | 47         | 61         |
|                                                       | <b>Hippocampal fissure</b>       | 45                                             | 14.4      | 40         | 50         | 49         | 16.5     | 43         | 55         |
|                                                       | <b>Presubiculum</b>              | 434                                            | 62.7      | 411        | 457        | 403        | 65.4     | 379        | 428        |
|                                                       | <b>Subiculum*</b>                | 602                                            | 55.9      | 581        | 622        | 575        | 65.0     | 551        | 599        |
|                                                       | <b>Hippocampal total volume</b>  | 3293                                           | 324.3     | 3174       | 3412       | 3205       | 410.5    | 3052       | 3359       |
| <b>LEFT</b>                                           | <b>CA1*</b>                      | 306                                            | 37.1      | 292        | 320        | 300        | 35.6     | 287        | 313        |
|                                                       | <b>CA2_3</b>                     | 907                                            | 117.8     | 864        | 951        | 870        | 126.1    | 823        | 917        |
|                                                       | <b>CA4 DG*</b>                   | 514                                            | 63.7      | 491        | 538        | 496        | 68.8     | 470        | 522        |
|                                                       | <b>Fimbria</b>                   | 55                                             | 16.2      | 49         | 61         | 59         | 24.5     | 50         | 68         |
|                                                       | <b>Hippocampal fissure</b>       | 42                                             | 18.6      | 35         | 49         | 45         | 17.6     | 38         | 51         |
|                                                       | <b>presubiculum</b>              | 450                                            | 67.3      | 426        | 475        | 436        | 67.1     | 411        | 461        |
|                                                       | <b>subiculum</b>                 | 599                                            | 76.2      | 571        | 627        | 582        | 72.5     | 555        | 609        |
|                                                       | <b>Hippocampal total volume*</b> | 3212                                           | 334.0     | 3090       | 3335       | 3128       | 343.3    | 3000       | 3256       |
| <b>eTIV</b>                                           |                                  | 1310178.35                                     | 178568.72 | 1244678.82 | 1375677.89 | 1289544.10 | 221918.3 | 1206678.42 | 1372409.78 |
| <b>MTL thickness (mm)</b>                             |                                  |                                                |           |            |            |            |          |            |            |
| <b>RIGHT</b>                                          | <b>entorhinal</b>                | 3.53                                           | 0.39      | 3.39       | 3.68       | 3.46       | 0.44     | 3.30       | 3.62       |
|                                                       | <b>Parahippocampus</b>           | 2.70                                           | 0.32      | 2.58       | 2.81       | 2.79       | 0.25     | 2.70       | 2.88       |
|                                                       | <b>perirhinal</b>                | 3.34                                           | 0.44      | 3.17       | 3.50       | 3.36       | 0.36     | 3.22       | 3.49       |
|                                                       | <b>MeanThic</b>                  | 2.32                                           | 0.09      | 2.28       | 2.35       | 2.33       | 0.09     | 2.30       | 2.37       |
| <b>LEFT</b>                                           | <b>entorhinal</b>                | 3.38                                           | 0.32      | 3.27       | 3.50       | 3.39       | 0.28     | 3.29       | 3.50       |
|                                                       | <b>parahippocampus</b>           | 2.69                                           | 0.37      | 2.55       | 2.83       | 2.80       | 0.40     | 2.66       | 2.95       |
|                                                       | <b>Perirhinal*</b>               | 3.17                                           | 0.39      | 3.03       | 3.31       | 3.30       | 0.35     | 3.16       | 3.43       |
|                                                       | <b>MeanThic</b>                  | 2.32                                           | 0.08      | 2.29       | 2.35       | 2.34       | 0.09     | 2.30       | 2.37       |
| <b>Cortical thickness of other brain's areas (mm)</b> |                                  |                                                |           |            |            |            |          |            |            |
|                                                       |                                  | Controls                                       |           |            |            | SCD        |          |            |            |
|                                                       |                                  | Mean                                           | SD        | -95%CI     | +95%CI     | Mean       | SD       | -95%CI     | +95%CI     |

|             |                                              |      |     |      |      |      |      |      |      |
|-------------|----------------------------------------------|------|-----|------|------|------|------|------|------|
| <b>LEFT</b> | <b>Banks of the Superior Temporal Sulcus</b> | 2.36 | .13 | 2.31 | 2.41 | 2.31 | 0.18 | 2.24 | 2.38 |
|             | <b>Caudal Anterior Cingulate</b>             | 2.56 | .28 | 2.45 | 2.66 | 2.69 | 0.33 | 2.57 | 2.81 |
|             | <b>Caudal Middle Frontal</b>                 | 2.32 | .17 | 2.26 | 2.66 | 2.38 | 0.16 | 2.32 | 2.44 |
|             | <b>Cuneus</b>                                | 1.66 | .12 | 1.62 | 1.71 | 1.70 | 0.13 | 1.65 | 1.75 |
|             | <b>Fusiform</b>                              | 2.64 | .11 | 2.60 | 2.68 | 2.62 | 0.16 | 2.56 | 2.68 |
|             | <b>Inferior Parietal</b>                     | 2.28 | .10 | 2.24 | 2.31 | 2.31 | 0.10 | 2.27 | 2.35 |
|             | <b>Inferior Temporal</b>                     | 2.71 | .11 | 2.66 | 2.75 | 2.67 | 0.21 | 2.59 | 2.75 |
|             | <b>Isthmus Cingulate</b>                     | 2.32 | .17 | 2.26 | 2.38 | 2.39 | 0.26 | 2.30 | 2.49 |
|             | <b>Lateral occipital</b>                     | 2.03 | .10 | 2.00 | 2.07 | 2.01 | 0.11 | 1.97 | 2.05 |
|             | <b>Lateral orbitofrontal</b>                 | 2.55 | .12 | 2.50 | 2.59 | 2.54 | 0.14 | 2.48 | 2.59 |
|             | <b>Lingual</b>                               | 1.84 | .11 | 1.80 | 1.88 | 1.85 | 0.12 | 1.80 | 1.89 |
|             | <b>Medial orbitofrontal</b>                  | 2.33 | .12 | 2.28 | 2.37 | 2.25 | 0.16 | 2.19 | 2.31 |
|             | <b>Middle temporal</b>                       | 2.70 | .12 | 2.65 | 2.74 | 2.71 | 0.15 | 2.65 | 2.76 |
|             | <b>Paracentral</b>                           | 2.26 | .20 | 2.19 | 2.34 | 2.29 | 0.12 | 2.25 | 2.34 |
|             | <b>Pars opercularis</b>                      | 2.41 | .14 | 2.36 | 2.46 | 2.39 | 0.15 | 2.33 | 2.44 |
|             | <b>Pars orbitalis</b>                        | 2.57 | .19 | 2.50 | 2.64 | 2.54 | 0.20 | 2.46 | 2.61 |
|             | <b>Pars triangularis</b>                     | 2.30 | .14 | 2.25 | 2.36 | 2.30 | 0.15 | 2.24 | 2.35 |
|             | <b>Pericalcarine</b>                         | 1.43 | .11 | 1.39 | 1.47 | 1.48 | 0.16 | 1.42 | 1.54 |
|             | <b>Postcentral</b>                           | 1.87 | .11 | 1.83 | 1.91 | 1.92 | 0.10 | 1.88 | 1.96 |
|             | <b>Posterior cingulate</b>                   | 2.39 | .17 | 2.33 | 2.45 | 2.41 | 0.14 | 2.36 | 2.47 |
|             | <b>Precentral</b>                            | 2.40 | .17 | 2.34 | 2.45 | 2.43 | 0.13 | 2.38 | 2.48 |
|             | <b>Precuneus</b>                             | 2.18 | .14 | 2.12 | 2.23 | 2.22 | 0.13 | 2.17 | 2.27 |
|             | <b>Rostral anterior cingulate</b>            | 2.69 | .21 | 2.62 | 2.77 | 2.70 | 0.26 | 2.60 | 2.79 |
|             | <b>Rostral Middle Frontal</b>                | 2.17 | .13 | 2.12 | 2.21 | 2.21 | 0.12 | 2.16 | 2.25 |
|             | <b>Superior Frontal</b>                      | 2.52 | .17 | 2.46 | 2.58 | 2.53 | 0.12 | 2.49 | 2.58 |
|             | <b>Superior Parietal</b>                     | 2.00 | .14 | 1.94 | 2.05 | 2.04 | 0.12 | 1.99 | 2.08 |
|             | <b>Superior temporal</b>                     | 2.60 | .15 | 2.55 | 2.66 | 2.58 | 0.16 | 2.53 | 2.64 |
|             | <b>Supramarginal</b>                         | 2.34 | .12 | 2.30 | 2.39 | 2.40 | 0.16 | 2.34 | 2.46 |
|             | <b>Frontal Pole</b>                          | 2.62 | .22 | 2.53 | 2.70 | 2.59 | 0.34 | 2.47 | 2.71 |
|             | <b>Temporal pole</b>                         | 3.64 | .31 | 3.53 | 3.75 | 3.66 | 0.38 | 3.52 | 3.80 |
|             | <b>Transverse temporal</b>                   | 2.18 | .21 | 2.10 | 2.25 | 2.16 | 0.23 | 2.07 | 2.25 |
|             | <b>Insula</b>                                | 2.90 | .15 | 2.84 | 2.95 | 2.90 | 0.13 | 2.85 | 2.95 |
|             | <b>Mean thickness</b>                        | 2.32 | .10 | 2.28 | 2.35 | 2.33 | 0.08 | 2.30 | 2.36 |

|              |                                              |      |      |      |      |      |      |      |      |
|--------------|----------------------------------------------|------|------|------|------|------|------|------|------|
| <b>RIGHT</b> | <b>Banks of the Superior Temporal Sulcus</b> | 2.39 | 0.15 | 2.34 | 2.45 | 2.42 | 0.15 | 2.36 | 2.47 |
|              | <b>Caudal Anterior Cingulate</b>             | 2.50 | 0.18 | 2.44 | 2.57 | 2.46 | 0.23 | 2.38 | 2.55 |
|              | <b>Caudal Middle Frontal</b>                 | 2.36 | 0.17 | 2.30 | 2.42 | 2.35 | 0.16 | 2.29 | 2.41 |
|              | <b>Cuneus</b>                                | 1.68 | 0.14 | 1.63 | 1.74 | 1.72 | 0.20 | 1.65 | 1.80 |
|              | <b>Fusiform</b>                              | 2.59 | 0.15 | 2.53 | 2.64 | 2.56 | 0.19 | 2.49 | 2.63 |
|              | <b>Inferior Parietal</b>                     | 2.25 | 0.11 | 2.21 | 2.29 | 2.29 | 0.11 | 2.25 | 2.33 |
|              | <b>Inferior Temporal</b>                     | 2.68 | 0.12 | 2.64 | 2.73 | 2.70 | 0.23 | 2.61 | 2.79 |
|              | <b>Isthmus Cingulate</b>                     | 2.24 | 0.18 | 2.17 | 2.30 | 2.27 | 0.26 | 2.17 | 2.36 |
|              | <b>Lateral occipital</b>                     | 2.06 | 0.10 | 2.03 | 2.10 | 2.07 | 0.10 | 2.03 | 2.11 |
|              | <b>Lateral orbitofrontal</b>                 | 2.51 | 0.12 | 2.46 | 2.56 | 2.53 | 0.16 | 2.48 | 2.59 |
|              | <b>Lingual</b>                               | 1.89 | 0.10 | 1.86 | 1.93 | 1.88 | 0.10 | 1.85 | 1.92 |
|              | <b>Medial orbitofrontal</b>                  | 2.33 | 0.14 | 2.28 | 2.38 | 2.34 | 0.16 | 2.28 | 2.40 |
|              | <b>Middle temporal</b>                       | 2.72 | 0.14 | 2.66 | 2.77 | 2.76 | 0.19 | 2.69 | 2.83 |
|              | <b>Paracentral</b>                           | 2.24 | 0.18 | 2.17 | 2.30 | 2.27 | 0.19 | 2.20 | 2.34 |
|              | <b>Pars opercularis</b>                      | 2.44 | 0.15 | 2.38 | 2.50 | 2.38 | 0.13 | 2.33 | 2.43 |
|              | <b>Pars orbitalis</b>                        | 2.54 | 0.19 | 2.47 | 2.61 | 2.51 | 0.19 | 2.44 | 2.58 |
|              | <b>Pars triangularis</b>                     | 2.31 | 0.15 | 2.25 | 2.36 | 2.31 | 0.13 | 2.26 | 2.35 |
|              | <b>Pericalcarine</b>                         | 1.49 | 0.12 | 1.45 | 1.54 | 1.52 | 0.16 | 1.46 | 1.58 |
|              | <b>Postcentral</b>                           | 1.85 | 0.12 | 1.81 | 1.90 | 1.88 | 0.09 | 1.84 | 1.91 |
|              | <b>Posterior cingulate</b>                   | 2.35 | 0.13 | 2.30 | 2.40 | 2.36 | 0.15 | 2.30 | 2.41 |
|              | <b>Precentral</b>                            | 2.39 | 0.18 | 2.33 | 2.46 | 2.39 | 0.13 | 2.34 | 2.44 |
|              | <b>Precuneus</b>                             | 2.17 | 0.13 | 2.13 | 2.22 | 2.22 | 0.12 | 2.17 | 2.26 |
|              | <b>Rostral anterior cingulate</b>            | 2.76 | 0.19 | 2.69 | 2.83 | 2.78 | 0.18 | 2.71 | 2.84 |
|              | <b>Rostral Middle Frontal</b>                | 2.18 | 0.13 | 2.14 | 2.23 | 2.21 | 0.13 | 2.16 | 2.25 |
|              | <b>Superior Frontal</b>                      | 2.55 | 0.14 | 2.50 | 2.60 | 2.56 | 0.14 | 2.51 | 2.61 |
|              | <b>Superior Parietal</b>                     | 1.97 | 0.13 | 1.92 | 2.02 | 2.01 | 0.11 | 1.97 | 2.05 |
|              | <b>Superior temporal</b>                     | 2.63 | 0.15 | 2.58 | 2.69 | 2.62 | 0.17 | 2.56 | 2.69 |
|              | <b>Supramarginal</b>                         | 2.34 | 0.14 | 2.29 | 2.40 | 2.35 | 0.12 | 2.31 | 2.40 |
|              | <b>Frontal Pole</b>                          | 2.66 | 0.25 | 2.57 | 2.76 | 2.61 | 0.30 | 2.50 | 2.72 |
|              | <b>Temporal pole</b>                         | 3.79 | 0.30 | 3.68 | 3.89 | 3.74 | 0.36 | 3.60 | 3.87 |
|              | <b>Transverse temporal</b>                   | 2.23 | 0.26 | 2.14 | 2.33 | 2.21 | 0.21 | 2.13 | 2.28 |
|              | <b>Insula</b>                                | 2.86 | 0.17 | 2.80 | 2.92 | 2.87 | 0.16 | 2.81 | 2.93 |

|                       |      |      |      |      |      |      |      |      |
|-----------------------|------|------|------|------|------|------|------|------|
| <b>Mean thickness</b> | 2.32 | 0.10 | 2.28 | 2.35 | 2.33 | 0.08 | 2.29 | 2.36 |
|-----------------------|------|------|------|------|------|------|------|------|

CA: Cornu Ammonis; eTIV: estimated total intracranial volume

Table shows not corrected data, while analyses were based on eTIV corrected data

\* Analyses based on log transformed data
